# Supplementary material for: Functional Dissection of Regulatory Models Using Gene Expression Data of Deletion Mutants
Source: PubMed Central journal article supplement (PMC3764135; doi:10.1371/journal.pgen.1003757), 2013-09-05

Figure S3

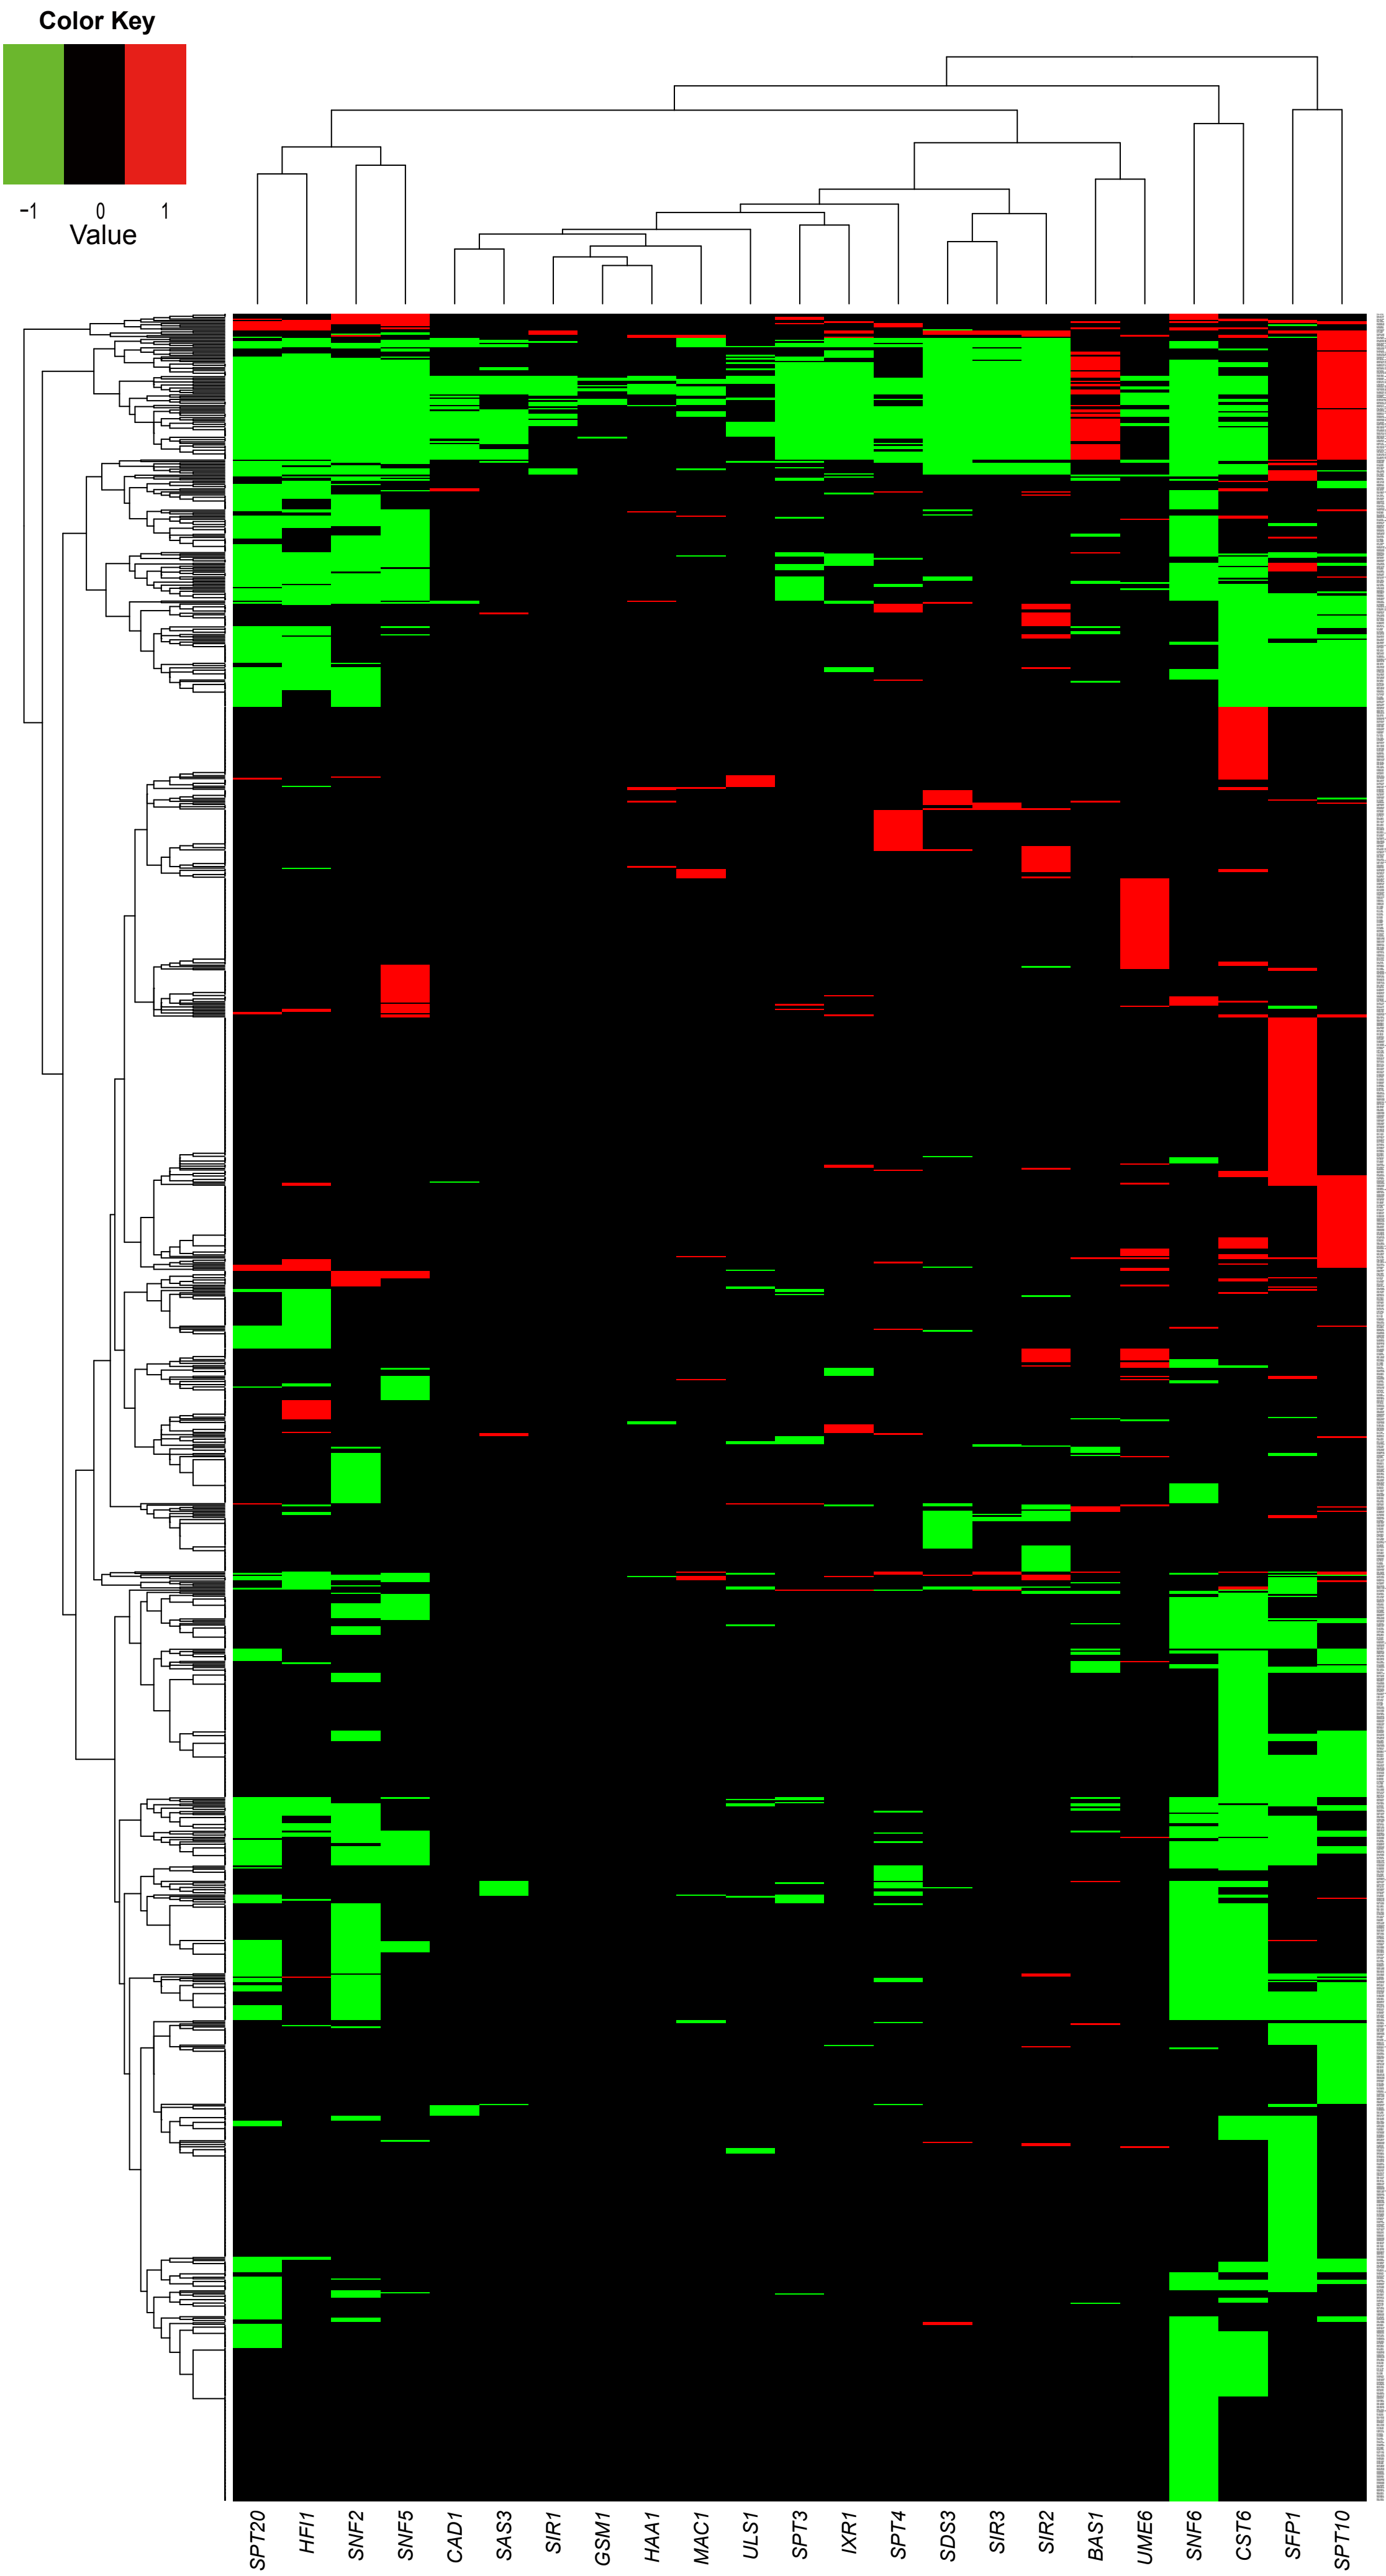

Supplement: pgen.1003757.s003.pdf [file pgen.1003757.s003.pdf]
